# Supplementary material for: Structural Insights into the Distortion of the Ribosomal Small Subunit at Different Magnesium Concentrations
Source: MDPI journal article supplement (doi:10.3390/biom13030566), 2023-03-20
Supplement: s1 [file s1]

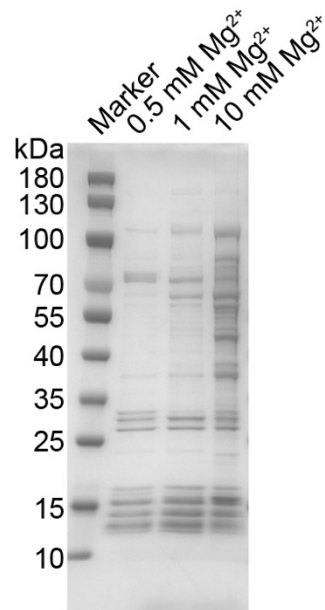

**Figure S8. Low magnesium concentration disassociated the ribosomal proteins.**  
Analysis of the ribosomal proteins for the 30S peak under 0.5, 1 and 10 mM Mg<sup>2+</sup> by SDS-PAGE.
