# Supplementary material for: Structural Insights into the Distortion of the Ribosomal Small Subunit at Different Magnesium Concentrations
Source: MDPI journal article supplement (doi:10.3390/biom13030566), 2023-03-20
Supplement: s1 [file s1]

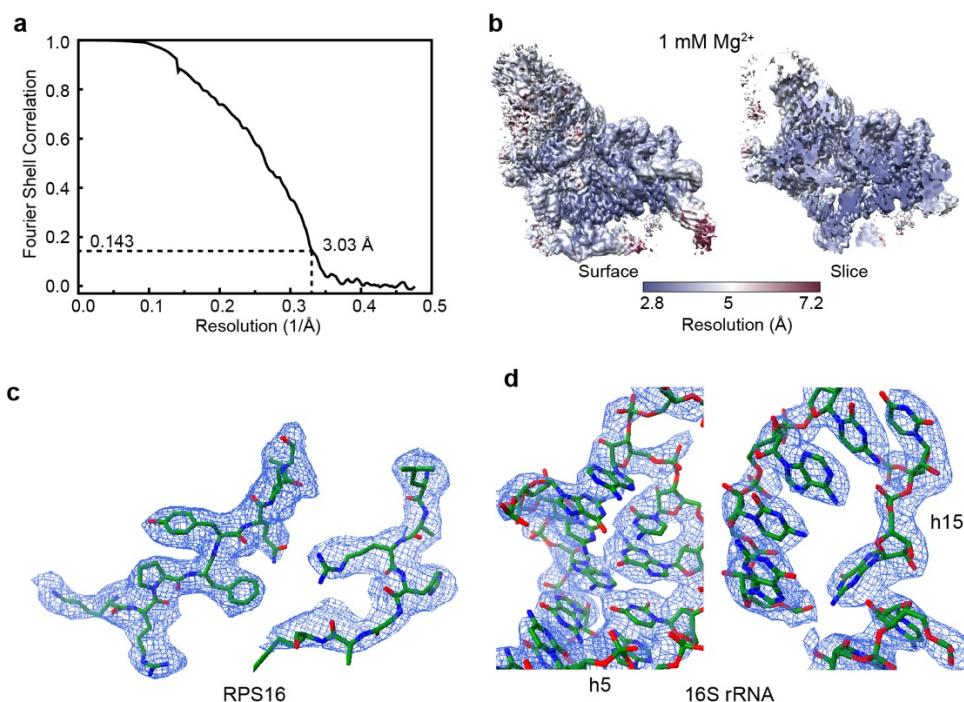

**Figure S2. Quality of the map for 30S at 1 mM  $Mg^{2+}$ .** **a.** The Fourier Shell Correlation (FSC) curve were calculated in Relion 3.1.0 and gold standard criteria with a value of 0.143 was used. **b.** The sharpened density map colored by local resolution in surface and slice views for the body of 30S under 1 mM  $Mg^{2+}$  concentration. **c, d.** Representative density for ribosomal protein (**c**) and 16S rRNA (**d**) showed the quality of the map.
