# Supplementary material for: Structural Insights into the Distortion of the Ribosomal Small Subunit at Different Magnesium Concentrations
Source: MDPI journal article supplement (doi:10.3390/biom13030566), 2023-03-20
Supplement: s1 [file s1]

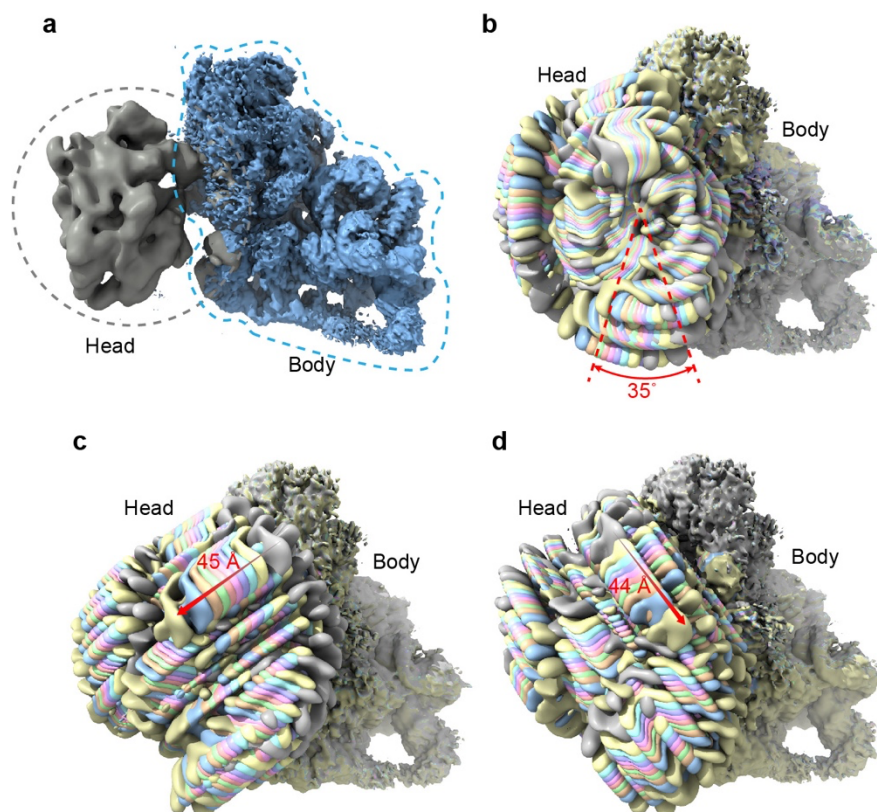

**Figure S4. Low concentration of  $Mg^{2+}$  induce a large rotation of head in all directions.**

**a.** Multi-body refinement of particles for 30S at 1 mM  $Mg^{2+}$  with masks (dash line) on head (gray) or body (blue) part. **b.** Maps were aligned based on the body and rotation of head related to body was measured (red arrow). **c, d.** Same as a, but showing the rotation of head in other two directions (red arrows). The progressive colors of map represent different maps from volume 1 (grey) to 10 (yellow) in multi-body refinement.
